# Supplementary material for: Domestication Shapes the Community Structure and Functional Metagenomic Content of the Yak Fecal Microbiota
Source: Frontiers journal article supplement (doi:10.3389/fmicb.2021.594075), 2021-03-31
Supplement: Data_Sheet_2.xls [file Data_Sheet_2.xls]

## Sheet: Sheet1
Phylum	Domestic yak	Half_blood yak	Wild yak
k__Bacteria;p__Firmicutes	0.632297	0.69289	0.695778
k__Bacteria;p__Bacteroidetes	0.178995	0.189689	0.188826
k__Bacteria;p__Verrucomicrobia	0.119306	0.0663462	0.0574494
k__Bacteria;p__Actinobacteria	0.00970398	0.0136418	0.0185738
k__Bacteria;p__Lentisphaerae	0.0186946	0.00980651	0.0102563
k__Bacteria;p__Cyanobacteria	0.0147255	0.00788409	0.00610596
k__Bacteria;p__Proteobacteria	0.00921467	0.00750616	0.00859826
k__Bacteria;p__Tenericutes	0.00431753	0.003924	0.00358706
k__Bacteria;p__Planctomycetes	0.00585504	0.00252837	0.00244521
k__Archaea;p__Euryarchaeota	0.00478482	0.00106871	0.00256726
k__Bacteria;p__Spirochaetes	0.000818184	0.00196401	0.00226936
k__Bacteria;p__TM7	0.000568189	0.00165879	0.00152794
k__Bacteria;p__Elusimicrobia	0.000206117	0.000518939	0.000846174
k__Bacteria;p__Chloroflexi	0.000193146	0.000294685	0.000654451
k__Bacteria;p__Acidobacteria	0.00015286	0.000139329	0.000268926
k__Bacteria;p__Gemmatimonadetes	6.8992e-05	7.67864e-05	0.000169313
k__Bacteria;p__Synergistetes	5.12434e-05	1.25145e-05	1.707e-05
k__Bacteria;p__Deferribacteres	7.51875e-06	2.55639e-05	2.69233e-05
k__Bacteria;p__Nitrospirae	1.548e-05	2.0147e-05	7.36e-06
k__Bacteria;Other	9.91125e-06	4.31364e-06	4.736e-06
k__Bacteria;p__[Thermi]	0	0	1.55428e-05
k__Bacteria;p__WS3	1.3824e-05	0	2.97e-06
k__Bacteria;p__SR1	0	0	2.22e-06

## Sheet: Sheet2
GH10					GH28					GH53					GH5
Bacteria name	Domestic yak	Half-blood yak	Wild yak		Bacteria name	Domestic yak	Half-blood yak	Wild yak		Bacteria name	Domestic yak	Half-blood yak	Wild yak		Bacteria name	Domestic yak	Half-blood yak	Wild yak
Paludibacter_propionicigenes	0.163265	0.12381	0.114035		Prevotella_melaninogenica	0.0403253	0.0320897	0.0297601		Paenibacillus_sp.	0.0547945	0.0261283	0.0292683		Prevotella_intermedia	0.0458015
Nonomuraea_sp.	0.153061		0.0789474		Prevotella_fusca	0.0225689	0.0204207	0.0236897		Paenibacillus_mucilaginosus	0.0520548	0.0570071	0.0439024		Sphingopyxis_fribergensis	0.0330789	0.0183727	0.0181518
Bacteroides_ovatus	0.122449		0.131579		Prevotella_ruminicola	0.0204116	0.011669	0.014806		[Eubacterium]_rectale	0.0273973	0.04038	0.0146341		Bacteroides_salanitronis	0.0330789	0.0209974	0.019802
Echinicola_vietnamensis	0.0510204				Clostridioides_difficile	0.0180883	0.0155074	0.00740302		Streptococcus_lutetiensis	0.0246575		0.0195122		Erysipelothrix_larvae	0.0305344
Bacillus_coagulans	0.0408163				Paeniclostridium_sordellii	0.0174245	0.0159681			Burkholderia_cenocepacia	0.0246575	0.0166271			Phaeobacter_piscinae	0.0254453	0.0209974	0.0132013
Bacteroides_vulgatus	0.0306122		0.0964912		Clostridium_botulinum	0.0169267	0.0145862	0.0140657		Paenibacillus_terrae	0.0246575		0.0146341		Blastomonas_fulva	0.0254453
Opitutaceae_bacterium	0.0204082	0.0285714	0.0263158		Clostridiales_bacterium	0.0169267	0.02733	0.0161386		Streptococcus_anginosus	0.0219178				Cellvibrio_sp.	0.0229008
Cellulomonas_flavigena	0.0204082				Prevotella_intermedia	0.0162629	0.0145862	0.0185076		Prevotella_ruminicola	0.0219178	0.0213777			Lactobacillus_ruminis	0.0229008
Actinoplanes_sp.	0.0204082				Flavonifractor_plautii	0.0124461	0.0173499	0.0112526		Microbacterium_paludicola	0.0191781	0.0285036	0.0195122		Hymenobacter_sp.	0.0229008	0.0288714
Novosphingobium_resinovorum	0.0204082				Bacteroides_fragilis	0.0116163		0.00977199		Dictyoglomus_turgidum	0.0136986				Ruminococcus_bicirculans	0.0229008	0.0209974
Sporosarcina_ureae	0.0204082				Bacteroides_thetaiotaomicron	0.0112844	0.00813757	0.0112526		Xanthomonas_campestris	0.0136986				Aneurinibacillus_soli	0.0203562
Prevotella_dentalis	0.0204082				Barnesiella_viscericola	0.0111185	0.00921235			Streptomyces_hygroscopicus	0.0136986	0.0166271			Vibrio_cholerae	0.0203562	0.0262467	0.0132013
Ruminococcus_albus	0.0204082	0.0571429			Olsenella_sp.	0.0104547				Microbacterium_foliorum	0.0136986	0.0190024			Staphylococcus_aureus	0.0203562
Clostridium_lentocellum		0.0571429			Bacteroidales_bacterium	0.00995685		0.00992005		Streptomyces_sp.	0.0136986				Adlercreutzia_equolifaciens	0.0178117
Bacteroides_heparinolyticus		0.047619			Bacteroides_ovatus	0.00912712		0.00755108		Lactobacillus_reuteri	0.0136986				Calothrix_sp.	0.0152672
Bacteroides_cellulosilyticus		0.0285714			Parabacteroides_sp.	0.00879522	0.00921235			Microbacterium_testaceum	0.0136986				Pseudodesulfovibrio_indicus	0.0127226	0.0104987
Salinispora_tropica		0.0285714			Bacteroides_salanitronis	0.00846333	0.0090588			Lactobacillus_delbrueckii	0.0136986	0.0213777			Lactobacillus_amylovorus	0.0127226
Arcticibacterium_luteifluviistationis		0.0285714			Sphingobacterium_mizutaii	0.00829738	0.0102871			Bacteroides_heparinolyticus		0.0308789	0.0365854		Ruminococcus_albus		0.0262467	0.00990099
Brevibacterium_linens		0.0190476			Bacteroides_zoogleoformans		0.0110548	0.0078472		Lachnospiraceae_bacterium		0.023753			Prevotella_melaninogenica		0.0183727
Bifidobacterium_kashiwanohense		0.0190476			Oscillibacter_sp.		0.0110548			Anaerostipes_hadrus		0.0213777	0.0146341		[Eubacterium]_rectale		0.015748
Nocardia_cyriacigeorgica		0.0190476			Oscillibacter_valericigenes		0.0102871			Novosphingobium_sp.		0.0190024			Sphingobium_sp.		0.015748
Gordonia_phthalatica		0.0190476			Bernardetia_litoralis		0.00936588			Thermotoga_sp.		0.0166271			Ornithinimicrobium_sp.		0.0131234
Herbinix_sp.		0.0190476			Fusobacterium_periodonticum		0.00890527			Sanguibacter_keddieii		0.0166271	0.0146341		Candidatus_Izimaplasma		0.0131234
Bifidobacterium_longum		0.0190476			Ruminococcus_albus		0.00829111			Thermotoga_maritima		0.0142518	0.0195122		Phaeobacter_inhibens		0.0131234
Pseudopedobacter_saltans		0.0190476	0.0526316		Ornithobacterium_rhinotracheale		0.00798403			Bacillus_glycinifermentans		0.0142518			Sphingobacterium_sp.		0.0131234
Colwellia_psychrerythraea		0.0190476			Flavisolibacter_tropicus		0.00767695			Microbacterium_sp.		0.0118765			Streptomyces_sp.		0.0104987
Streptomyces_sp.		0.0190476			Proteus_vulgaris			0.0193959		Shewanella_piezotolerans			0.12439		Prevotella_fusca		0.0104987
Oscillibacter_valericigenes		0.0190476			Pseudoalteromonas_luteoviolacea			0.0164347		Gallaecimonas_sp.			0.0658537		Clostridium_saccharobutylicum		0.0104987
Kitasatospora_aureofaciens		0.0190476			Bacteroides_vulgatus			0.0128813		Paenibacillus_kribbensis			0.0243902		Victivallales_bacterium		0.0104987
Oscillibacter_sp.		0.0190476	0.0350877		Providencia_stuartii			0.012289		Faecalibacterium_prausnitzii			0.0146341		Lachnoclostridium_phytofermentans			0.206271
Ruminiclostridium_thermocellum		0.0190476			Providencia_alcalifaciens			0.0111045		[Eubacterium]_eligens			0.0146341		Treponema_denticola			0.158416
Ruminiclostridium_sp.		0.0190476			Vibrio_natriegens			0.0105123		Acinetobacter_sp.			0.0146341		Anaerostipes_hadrus			0.0544554
Bacillus_pseudofirmus		0.0190476			Shewanella_denitrificans			0.0105123		Idiomarina_sp.			0.0121951		Bacteroides_salanitronis			0.019802
Xanthomonas_vasicola			0.0701754		[Eubacterium]_hallii			0.0102162		Others	0.619178	0.584323	0.502439		Streptomyces_lavendulae			0.0165016
Lentzea_guizhouensis			0.0350877		Actinobacillus_suis			0.00873556							Lactobacillus_farciminis			0.0148515
Fibrella_sp.			0.0263158		Vibrio_rumoiensis			0.0085875							Clostridium_sp.			0.0115512
Opitutus_terrae			0.0263158		Clostridium_lentocellum			0.00829138							Paludisphaera_borealis			0.00990099
Tessaracoccus_flavus			0.0175439		Herbaspirillum_rubrisubalbicans			0.00755108							Luteimonas_sp.			0.00990099
Blautia_hansenii			0.0175439		Others	0.729505	0.709965	0.681522							Bacillus_smithii			0.00825082
Streptomyces_griseorubiginosus			0.0175439												Streptococcus_gallolyticus			0.00825082
Bifidobacterium_adolescentis			0.0175439												Kitasatospora_sp.			0.00825082
Bacteroides_thetaiotaomicron			0.0175439												Marinomonas_sp.			0.00825082
Others	0.295918	0.314286	0.219298												Others	0.59542	0.682415	0.410891
